# Supplementary material for: Seasonal trends of the polyp expansion and nutritional condition of Alcyonium acaule (Octocorallia, Alcyonacea)
Source: PeerJ. 2021 Oct 14;9:e12032. doi: 10.7717/peerj.12032 (PMC8520688; doi:10.7717/peerj.12032)
Supplement: Supplemental Information 1 [file peerj-09-12032-s001.xlsx]

## Sheet: OM
	Carbohydrates	Proteins	Lipids
WIGE1	33.98	191.06	37.5
WIGE2	28.34	239.1	30.61
WIGE3	39.79	143.02	44.39
WIFE1	32.75	230.775	41.23
WIFE2	27.67	275.765	26.655
WIFE3	37.64	185.76	55.8
WIMA1	31.53	270.49	44.96
WIMA2	27.01	312.43	22.7
WIMA3	35.5	228.5	67.21
SPAP1	32.86	134.81	78.09
SPAP2	26.55	160.73	55.57
SPAP3	39.4	108.8	100.61
SPMA1	27.25	217.23	66.19
SPMA2	24.33	261.45	39.69
SPMA3	30.2	173	92.68
SPJN1	26.43	223.38	73.89
SPJN2	18.64	282	37.59
SPJN3	34.38	164.67	110.18
SUJL1	26.84	137.28	68.62
SUJL2	22.39	183.7	41.86
SUJL3	31.33	90.7	95.37
SUAG1	21.43	236.47	24.4
SUAG2	18.98	280.69	18.3
SUAG3	23	192.2	30.49
SUSE1	25.61	177.81	42.96
SUSE2	19.2	219.7	31.83
SUSE3	31.9	135.87	54.08
AUOC1	19.39	164.96	31.61
AUOC2	15.8	196.2	26.31
AUOC3	22.9	133.7	36.91
AUNO1	22.45	163.5	37.19
AUNO2	19.08	177.22	24.73
AUNO3	25.81	149.77	49.64
AUDE1	23.88	186.43	31.65
AUDE2	17.65	216.93	22.37
AUDE3	30.51	155.9	40.92
